# Supplementary material for: Fluorene-based hyperbranched copolymers with spiro[3.3]heptane-2,6-dispirofluorene as the conjugation-uninterrupted branching point and their application in WPLEDs
Source: Royal Society of Chemistry journal article supplement (doi:10.1039/c5nj00667h), 2015-01-01
Supplement: c5nj00667h1.pdf [file c5nj00667h1.pdf]

## Supplementary Information

### Fluorene-based hyperbranched copolymers with spiro[3.3]heptane-2,6-dispirofluorene as the conjugation-uninterrupted branching point and their application in WPLEDs

Yuling Wu,<sup>ab</sup> Jie Li,<sup>ab</sup> Wenqing Liang,<sup>ab</sup> Junli Yang,<sup>ab</sup> Jing Sun,<sup>ab</sup> Hua Wang,<sup>ab</sup> Xuguang Liu,<sup>c</sup> Bingshe Xu,<sup>\*ab</sup> Wei Huang,<sup>d</sup>

<sup>a</sup> Key Laboratory of Interface Science and Engineering in Advanced Materials, Taiyuan University of Technology, Taiyuan, 030024, China.

<sup>b</sup> Research Center of Advanced Materials Science and Technology, Taiyuan University of Technology, Taiyuan, 030024, China.

<sup>c</sup> College of Chemistry and Chemical Engineering, Taiyuan University of Technology, Taiyuan, 030024, China.

<sup>d</sup> Key Laboratory for Organic Electronics & Information Displays (KLOEID) and Institute of Advanced Materials, Nanjing University of Posts and Telecommunications (NUPT), Nanjing, 210046, China.

\* Corresponding author. E-mail: Bingshe Xu: [xubs@tyut.edu.cn](mailto:xubs@tyut.edu.cn)

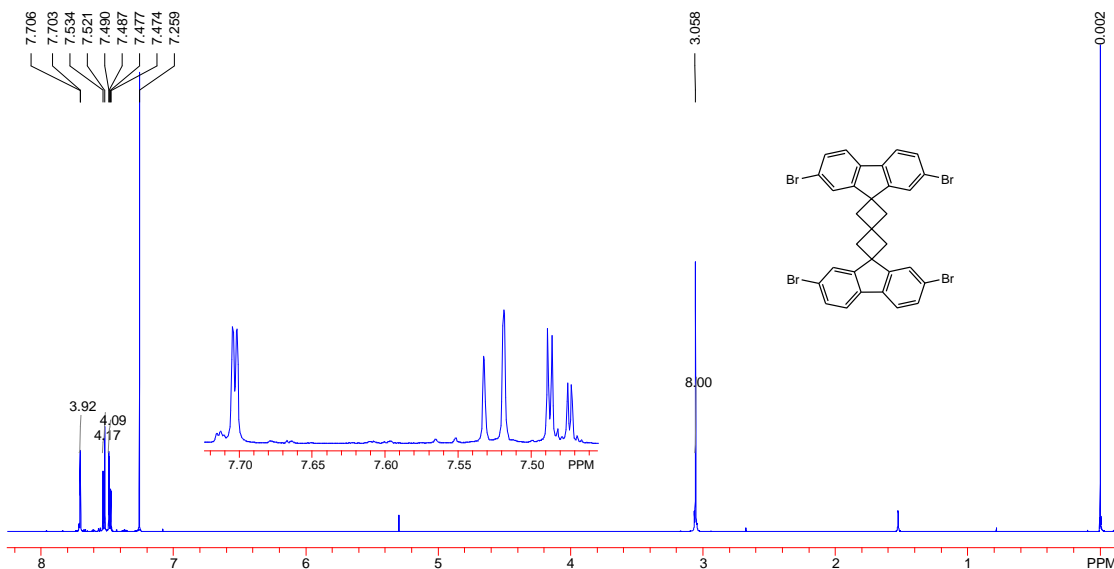

Figure S1.  $^1\text{H}$  NMR spectrum of **TBrSDF**.

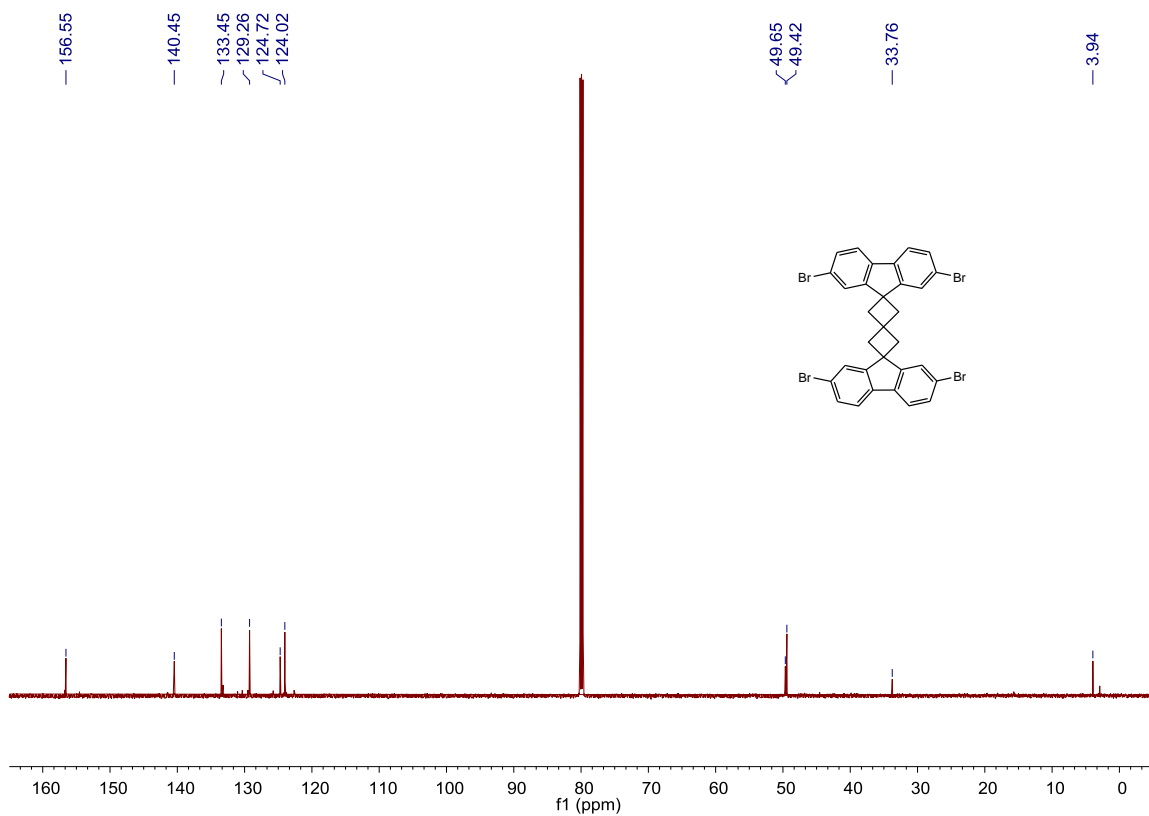

Figure S2.  $^{13}\text{C}$  NMR spectrum of **TBrSDF**.

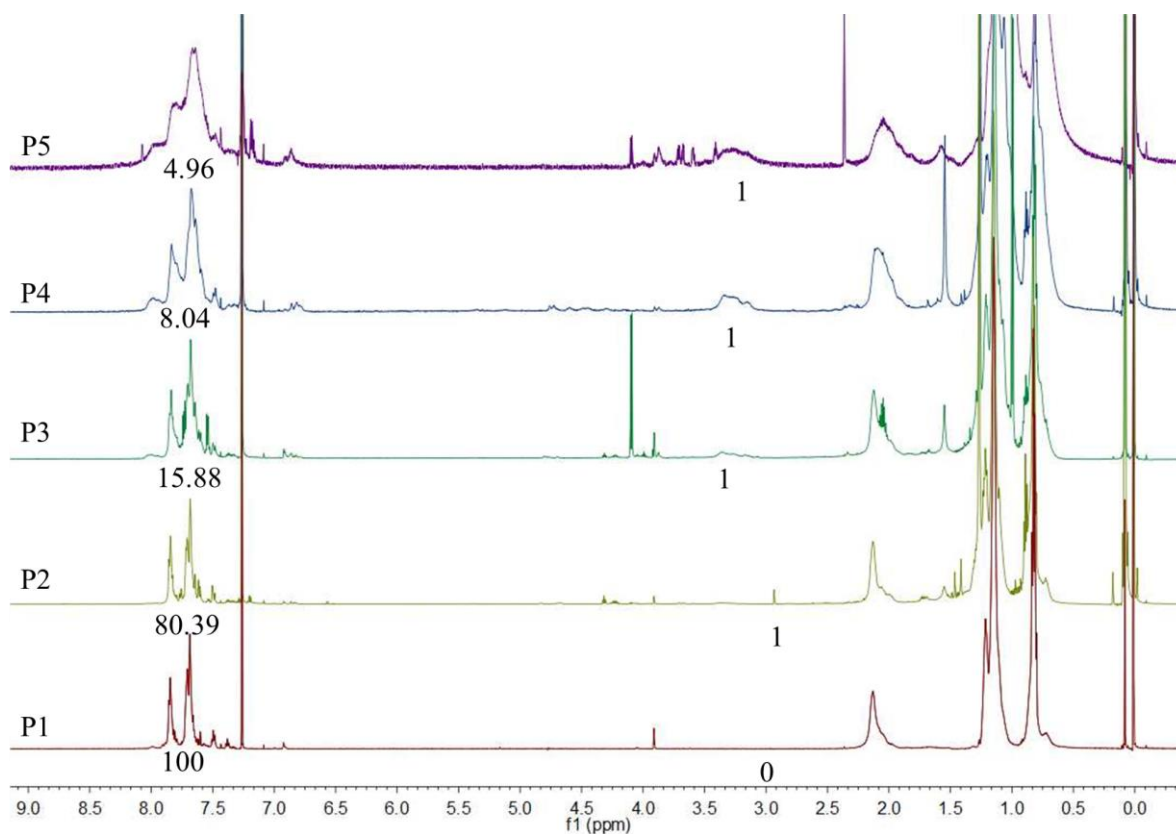

Figure S3.  $^1\text{H}$  NMR spectra of the copolymers.

Table 1. Polymerization results of the copolymers

| Copolymer | $n_{\text{TBrSDF}}^{\text{a}}$ |         | $n_{\text{TBrSDF}}^{\text{b}}$ |        |
|-----------|--------------------------------|---------|--------------------------------|--------|
|           | feed                           | found   | feed                           | found  |
| P1        | 100:0                          | 100:0   | 0                              | 0      |
| P2        | 75.75:1                        | 80.39:1 | 0.01                           | 0.0124 |
| P3        | 15.75:1                        | 15.88:1 | 0.05                           | 0.063  |
| P4        | 8.25:1                         | 8.04:1  | 0.10                           | 0.1243 |
| P5        | 4.50:1                         | 4.96:1  | 0.20                           | 0.2016 |

<sup>a</sup> The integral ratio between the aromatic ring of fluorene and the spiro[3.3]heptane of **TBrSDF**.

<sup>b</sup> The mole ratio of **TBrSDF** in copolymers.

The actual contents of spiro[3.3]heptane-2,6-dispirofluorene (**SDF**) were calculated by comparing the peak integral intensities of the proton signals of the spiro[3.3]heptane of **SDF** ( $\delta$  3.0-3.5) and the aromatic ring of fluorene ( $\delta$  7.4-8.0) of the copolymer and were close to the feed ratios.
